# Supplementary material
Source: PubMed Central journal article supplement (PMC2474516)
Supplement: 0802206105_0802206105SI.pdf [file 0802206105_0802206105SI.pdf]

# Supporting Information

Shah et al. 10.1073/pnas.0802206105

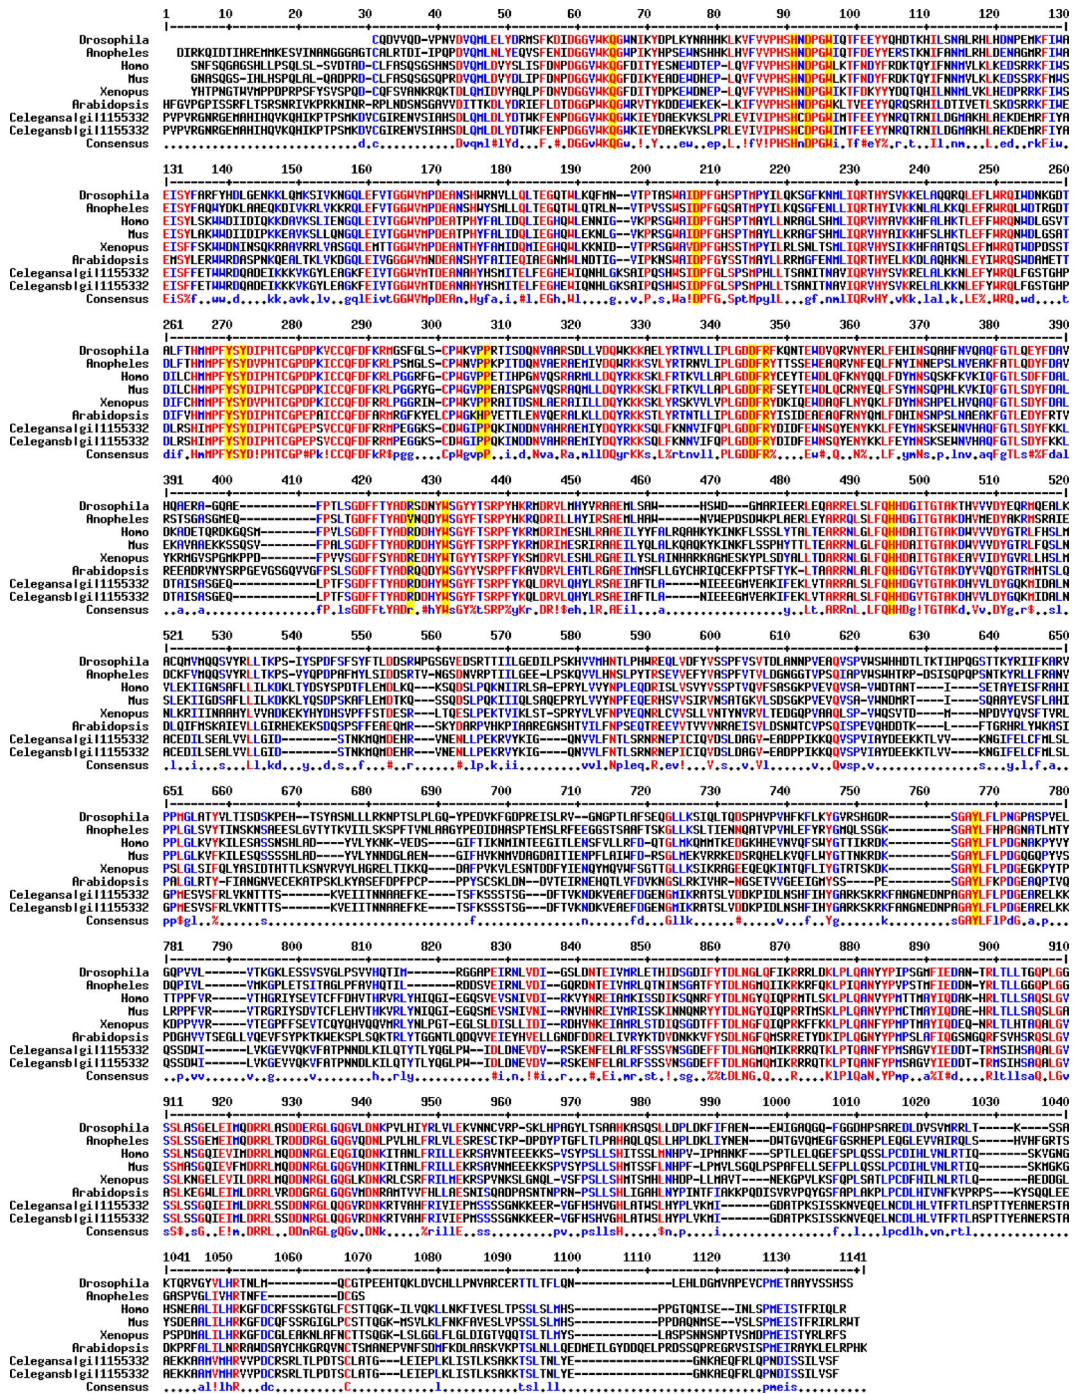

Fig. S1. A multiple sequence alignment comparing amino acid sequences of GMI1 from *Drosophila melanogaster*, *Anopheles gambia*, *Homo sapiens*, *Mus musculus*, *Xenopus laevis*, *Arabidopsis thaliana*, and *Caenorhabditis elegans*. Highlighted residues are essential for substrate binding and catalysis.

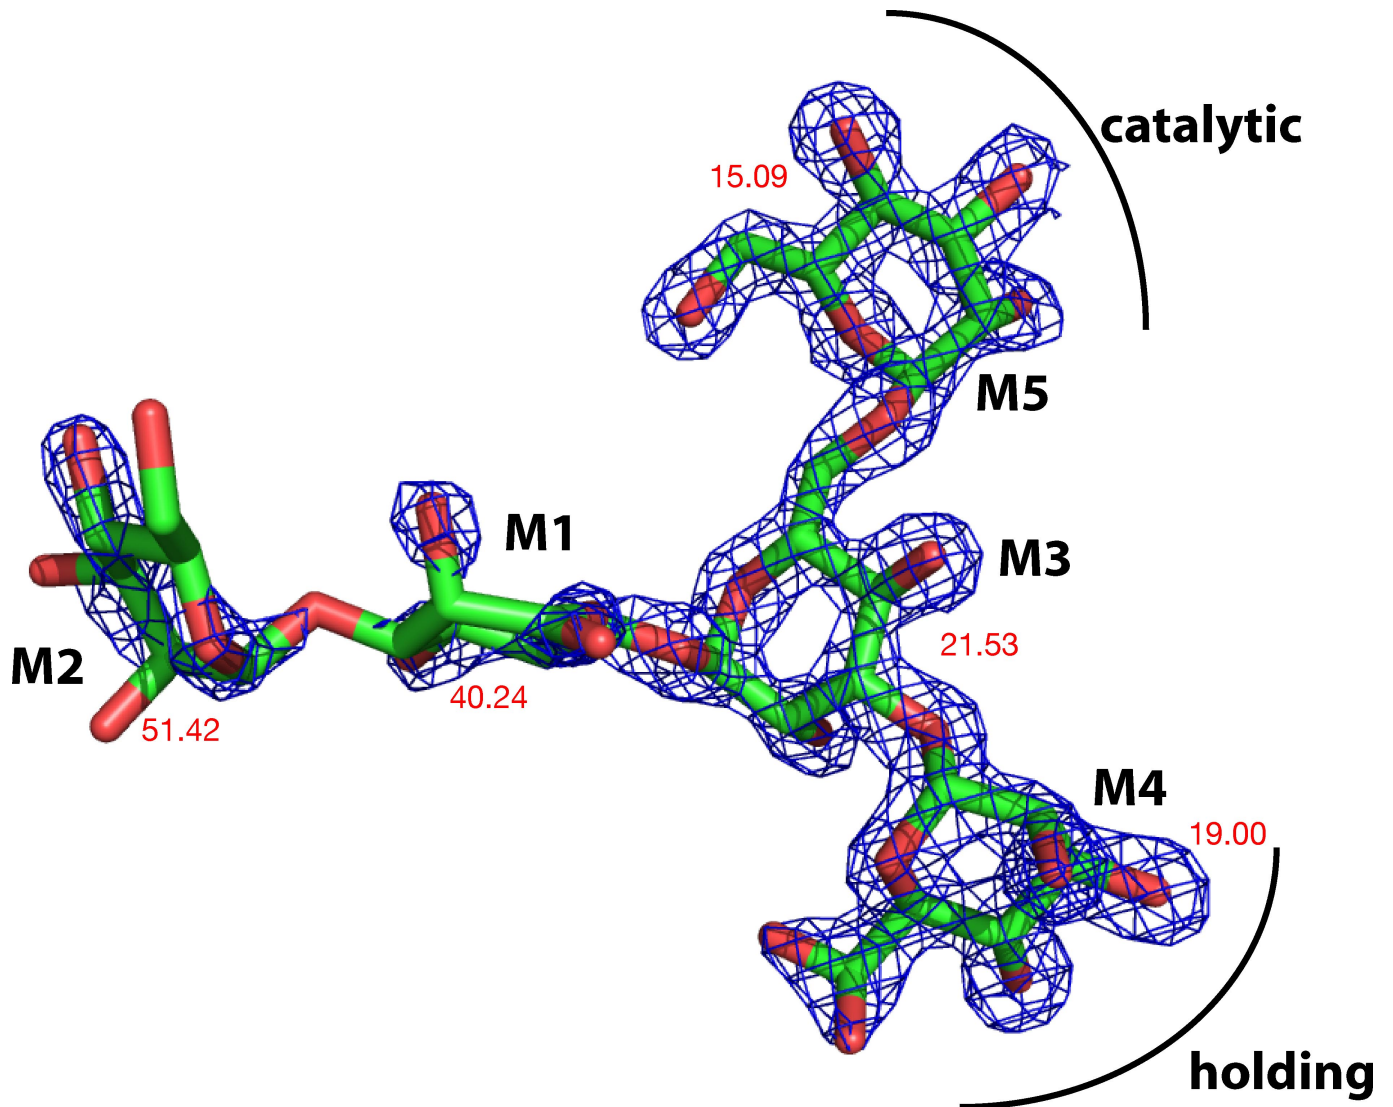

**Fig. S2.** Man<sub>5</sub> fitted to the  $F_o - F_c$  simulated annealing omit map electron density in the dGMII active site. The electron density is contoured to  $3.0 \sigma$  to show the quality of the density in the region of the catalytic and holding sites. When contoured at  $2.0 \sigma$ , density for the complete saccharide is present.



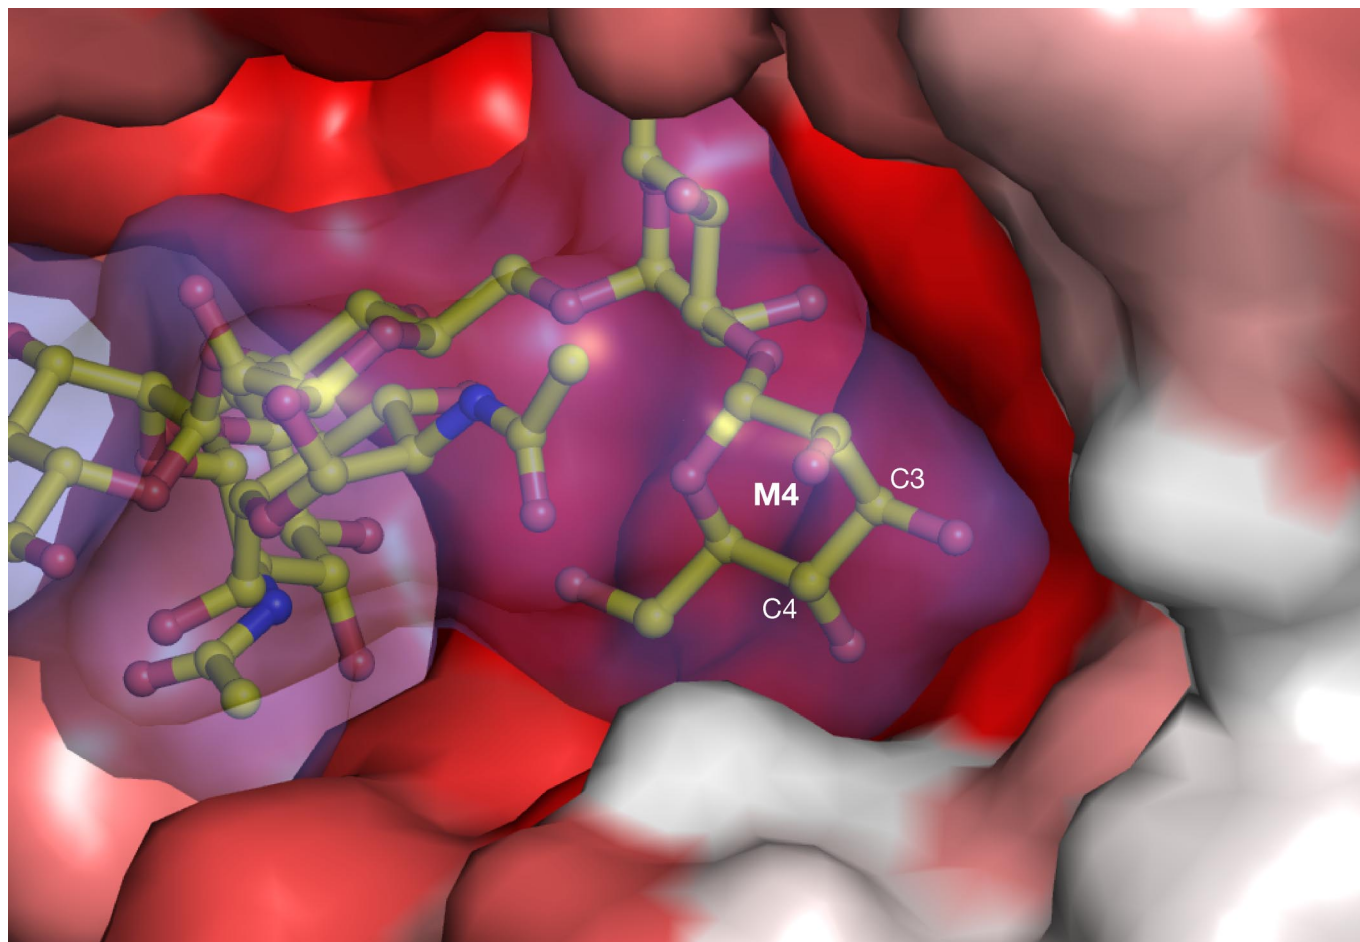

**Fig. S3.** Oligosaccharide position M4 ( $\alpha$ 1,3-linked mannose) packing tightly into the holding subsite. Positions 3 and 4 of M4 pack tightly against a wall of conserved residues, particularly R343 (not shown). The coloring of the protein reflects sequence conservation as determined by a multiple sequence alignment.

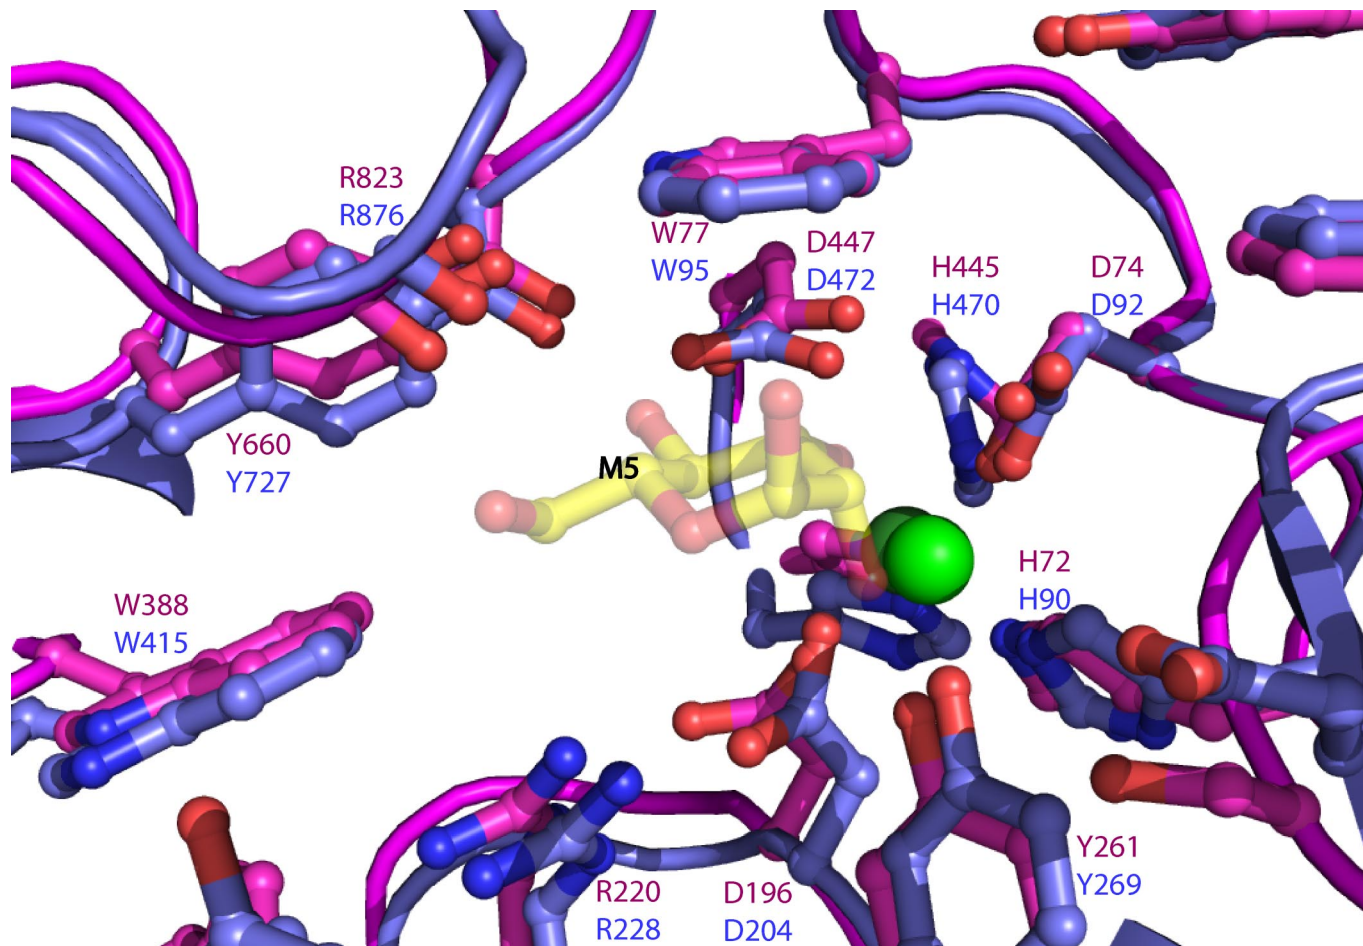

**Fig. 54.** A comparison of the atomic structures of the dGMII (blue) and bLM (magenta) catalytic sites. Relevant protein side chains are shown in stick representation and are numbered and colored respective to their protein. The M5 position as solved from the dGMII-substrate structure is presented in transparent yellow. Note that the side chains of the catalytic sites superimpose quite favorably, particularly those residues involved directly in saccharide coordination.

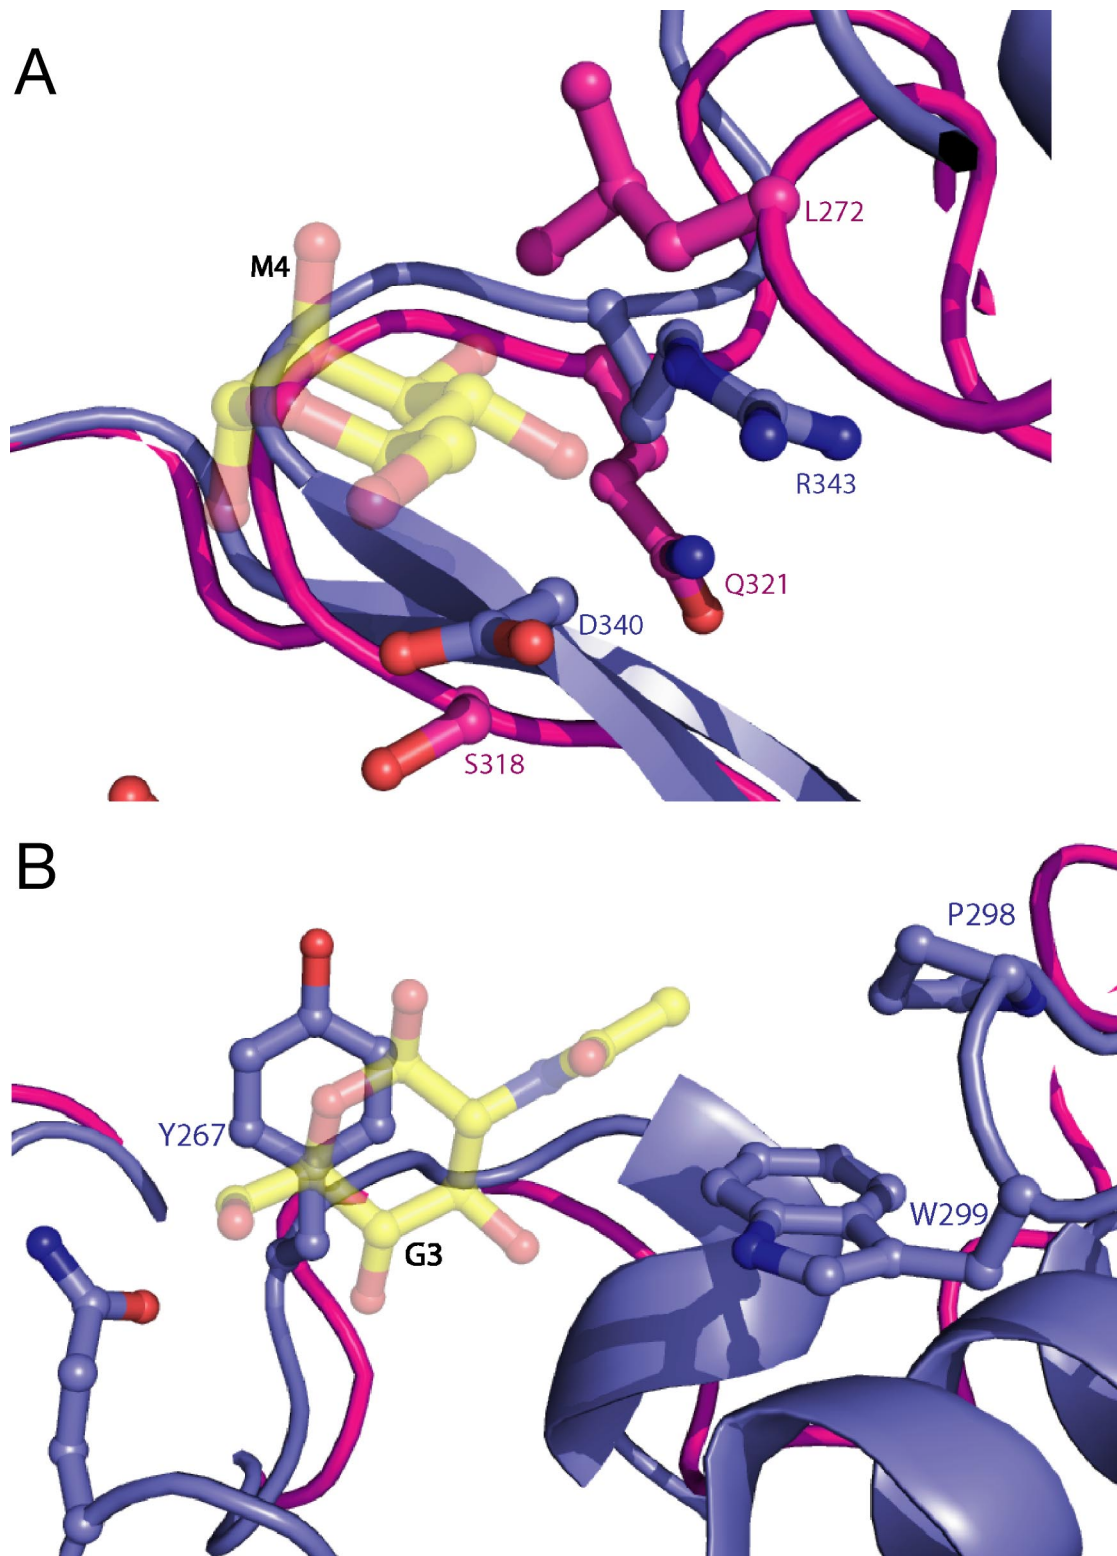

**Fig. 55.** Comparison of the atomic structures of the dGMII (blue) holding (A) and anchor (B) sites and the equivalent regions in bLM (magenta). Relevant protein side chains are shown in stick representation and are numbered and colored respective to their protein. The M4 and G3 positions as solved from the dGMII-substrate structure are presented in transparent yellow

Table S1. Data collection and refinement statistics

|                                                     | dGMII(D204A)-GnMan <sub>5</sub> Gn                    | dGMII(D204A)-Man <sub>5</sub>                         | dGMII(D204A)                                          |
|-----------------------------------------------------|-------------------------------------------------------|-------------------------------------------------------|-------------------------------------------------------|
| Data collection                                     |                                                       |                                                       |                                                       |
| Space group                                         | <i>P</i> 2 <sub>1</sub> 2 <sub>1</sub> 2 <sub>1</sub> | <i>P</i> 2 <sub>1</sub> 2 <sub>1</sub> 2 <sub>1</sub> | <i>P</i> 2 <sub>1</sub> 2 <sub>1</sub> 2 <sub>1</sub> |
| Cell dimensions                                     |                                                       |                                                       |                                                       |
| <i>a</i> , <i>b</i> , <i>c</i> , Å                  | 68.9, 109.6, 139.0                                    | 68.7, 110.0, 139.3                                    | 68.8, 109.9, 138.5                                    |
| $\alpha$ , $\beta$ , $\gamma$ , °                   | 90, 90, 90                                            | 90, 90, 90                                            | 90, 90, 90                                            |
| Resolution, Å                                       | 30–1.40 (1.44–1.40)                                   | 30–1.60 (1.62–1.60)                                   | 30–1.30 (1.39–1.30)                                   |
| <i>R</i> <sub>sym</sub>                             | 0.10 (0.49)                                           | 0.07 (0.28)                                           | 0.11 (0.33)                                           |
| <i>I</i> / $\sigma$ <i>I</i>                        | 14.7 (4.9)                                            | 16.5 (5.5)                                            | 11.2 (3.7)                                            |
| Completeness, %                                     | 99.94 (99.55)                                         | 98.5 (96.5)                                           | 99.4 (96.9)                                           |
| Redundancy                                          | 9.2 (7.0)                                             | 5.9 (5.0)                                             | 6.8 (4.0)                                             |
| Refinement                                          |                                                       |                                                       |                                                       |
| Resolution, Å                                       | 1.40                                                  | 1.60                                                  | 1.30                                                  |
| No. reflections                                     | 194,389                                               | 135,195                                               | 238,288                                               |
| <i>R</i> <sub>work</sub> / <i>R</i> <sub>free</sub> | 0.187 /0.209                                          | 0.159 /0.180                                          | 0.192 /0.216                                          |
| No. atoms                                           |                                                       |                                                       |                                                       |
| Protein                                             | 8434                                                  | 8,375                                                 | 8,415                                                 |
| Ligand                                              | 84                                                    | 57                                                    | Not applicable                                        |
| Water                                               | 1216                                                  | 1,190                                                 | 1,499                                                 |
| <i>B</i> factors                                    |                                                       |                                                       |                                                       |
| Protein                                             | 15.51                                                 | 15.35                                                 | 11.25                                                 |
| Ligand                                              | 19.11                                                 | 29.2                                                  | Not applicable                                        |
| Water                                               | 29.51                                                 | 28.3                                                  | 28.92                                                 |
| rms deviations                                      |                                                       |                                                       |                                                       |
| Bond lengths, Å                                     | 0.008                                                 | 0.015                                                 | 0.007                                                 |
| Bond angles, °                                      | 1.21                                                  | 1.6                                                   | 1.21                                                  |
| PDB structure ID                                    | 3CZN                                                  | 3CVS                                                  | 3CZS                                                  |

Number in parentheses are for the highest-resolution shells.

**Table S2. dGMII–GnMan<sub>5</sub>Gn interactions**

| Oligosaccharide |      | Protein |                 | Interaction type   |
|-----------------|------|---------|-----------------|--------------------|
| Residue         | Atom | Residue | Atom            |                    |
| M5              | O2   | Y269    | OH              | Hydrogen bond      |
| M5              | O3   | H471    | NE2             | Hydrogen bond      |
| M5              | O4   | Y727    | OH              | Hydrogen bond      |
| M5              | O2   | Zn      |                 | Metal coordination |
| M5              | O3   | Zn      |                 | Metal coordination |
| M5              |      | W95     |                 | Stacking           |
| M5              |      | Y727    |                 | Stacking           |
| M4              | O3   | R343    | NE              | Hydrogen bond      |
| M4              | O4   | R343    | NE              | Hydrogen bond      |
| M4              | O4   | R343    | NH <sub>2</sub> | Hydrogen bond      |
| M4              |      | D340    |                 | Stacking           |
| M2              |      | Q64     |                 | Stacking           |
| M1              | O4   | Y267    | OH              | Hydrogen bond      |
| G3              | O3   | H273    | NE2             | Hydrogen bond      |
| G3              |      | Y267    |                 | Stacking           |
| G3              |      | P298    |                 | Stacking           |
| G3              |      | P299    |                 | Stacking           |

**Table S3. Key residues in the dGMII catalytic site with their structurally aligned bLM equivalents**

| dGMII | bLM  | Role            |
|-------|------|-----------------|
| W95   | W77  | M5 stacking     |
| Y269  | Y261 | M5 H-bonding    |
| H471  | H446 | M5 H-bonding    |
| D472  | D447 | M5 H-bonding    |
| Y727  | Y660 | M5 H-bonding    |
| Zn    | Zn   | M5 coordination |
| H90   | H72  | Zn coordination |
| D92   | D74  | Zn coordination |
| H470  | H445 | Zn coordination |
| H471  | H446 | Zn coordination |
| D204  | D196 | Nucleophile     |
